# Supplementary material
Source: publisher figshare collection journal article supplement (https://karger.figshare.com/ndownloader/files/28411104)
Supplement: Supplementary file 1 [file 28411104]

Online Supplementary Fig. 1. HSROC curve regarding ICDAS at D1 histological level

Online Supplementary Fig. 2. HSROC curve regarding Ekstrand’s system at D3 histological level

Online Supplementary Fig. 3. HSROC curve regarding DIAGNOdent Pen at D1 histological level
